# Supplementary material for: Cryptogamic stem covers may contribute to nitrous oxide consumption by mature beech trees
Source: PubMed Central journal article supplement (PMC5643534; doi:10.1038/s41598-017-13781-7), 2017-10-16
Supplement: 41598_2017_13781_MOESM1_ESM.pdf [file 41598_2017_13781_MOESM1_ESM.pdf]

## **Supplementary Information**

### **Cryptogamic stem covers may contribute to nitrous oxide consumption by mature beech trees**

Katerina Machacova<sup>1,\*</sup>, Martin Maier<sup>2</sup>, Katerina Svobodova<sup>1</sup>, Friederike Lang<sup>2</sup> & Otmar Urban<sup>1</sup>

<sup>1</sup>Global Change Research Institute CAS, Belidla 986/4a, 603 00 Brno, Czech Republic

<sup>2</sup>Chair of Soil Ecology, Albert-Ludwigs-University, Bertoldstrasse 17, 79098 Freiburg, Germany

\*corresponding author, machacova.k@czechglobe.cz

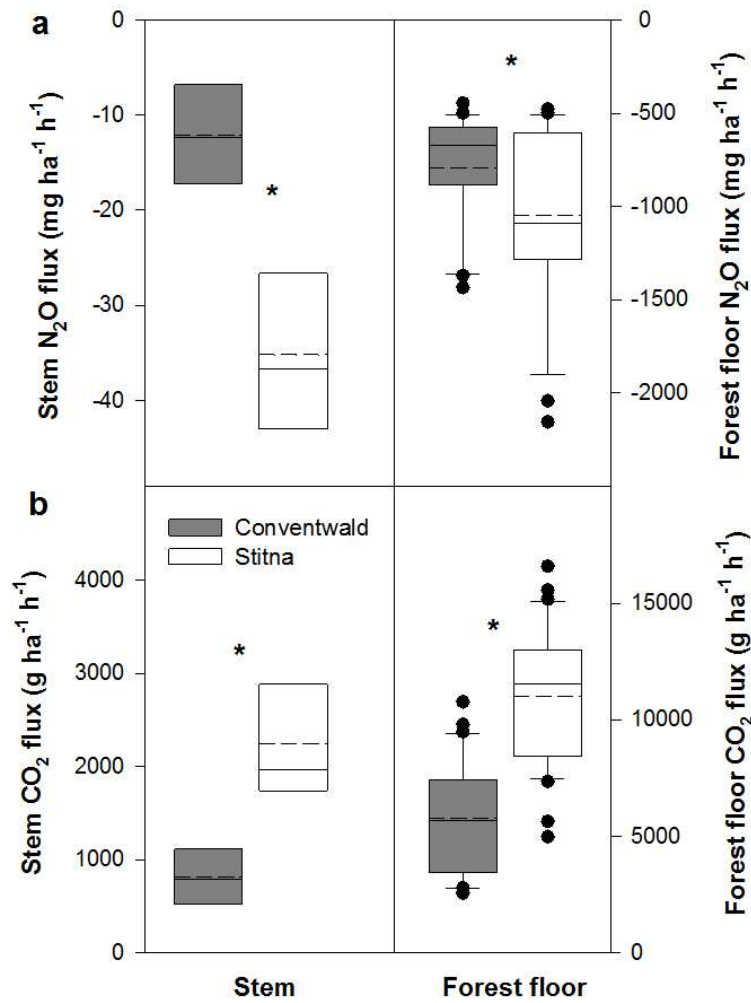

**Supplementary Figure S1.  $\text{N}_2\text{O}$  (a) and  $\text{CO}_2$  (b) fluxes at beech stem and forest floor level scaled up per unit ground area of two beech forest stands (Conventwald, Black Forest; Stitna, White Carpathians), measured during June–July 2015. For further information, see Fig. 1.**

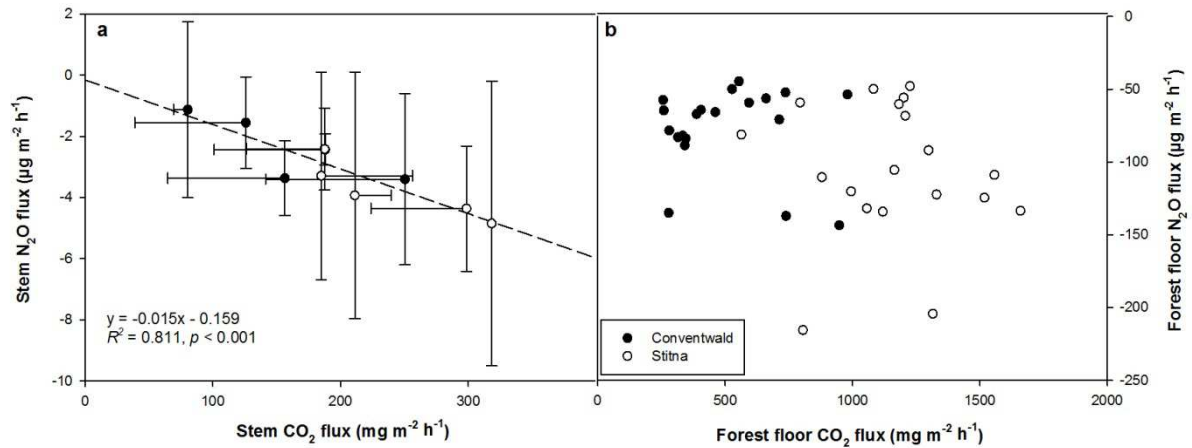

**Supplementary Figure S2. N<sub>2</sub>O versus CO<sub>2</sub> fluxes at beech stem (a) and forest floor (b) level in two beech forest stands (Conventwald, Black Forest; Stitna, White Carpathians).** For further information about flux determination, see Fig. 1.

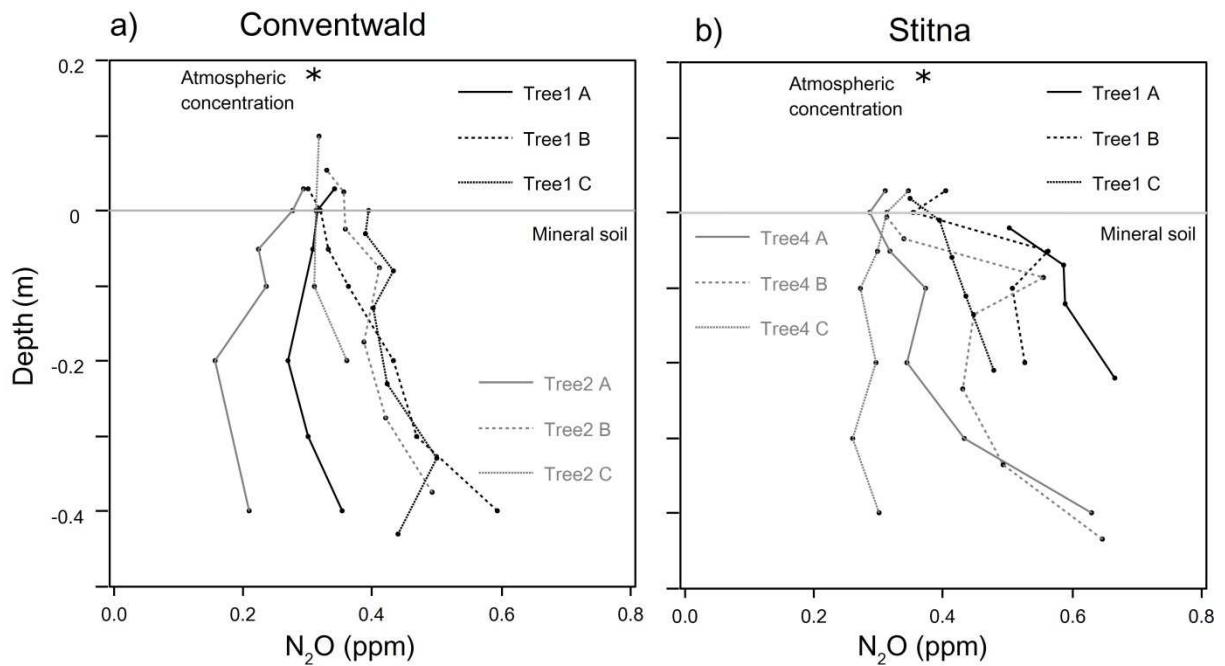

**Supplementary Figure S3. Soil N<sub>2</sub>O profiles close to two beech trees in Conventwald (a) and two trees in Stitna (b).** Profiles A, B and C lie on a straight line (transect) from stems towards the outer rim of the crown (profile A next to tree stem).

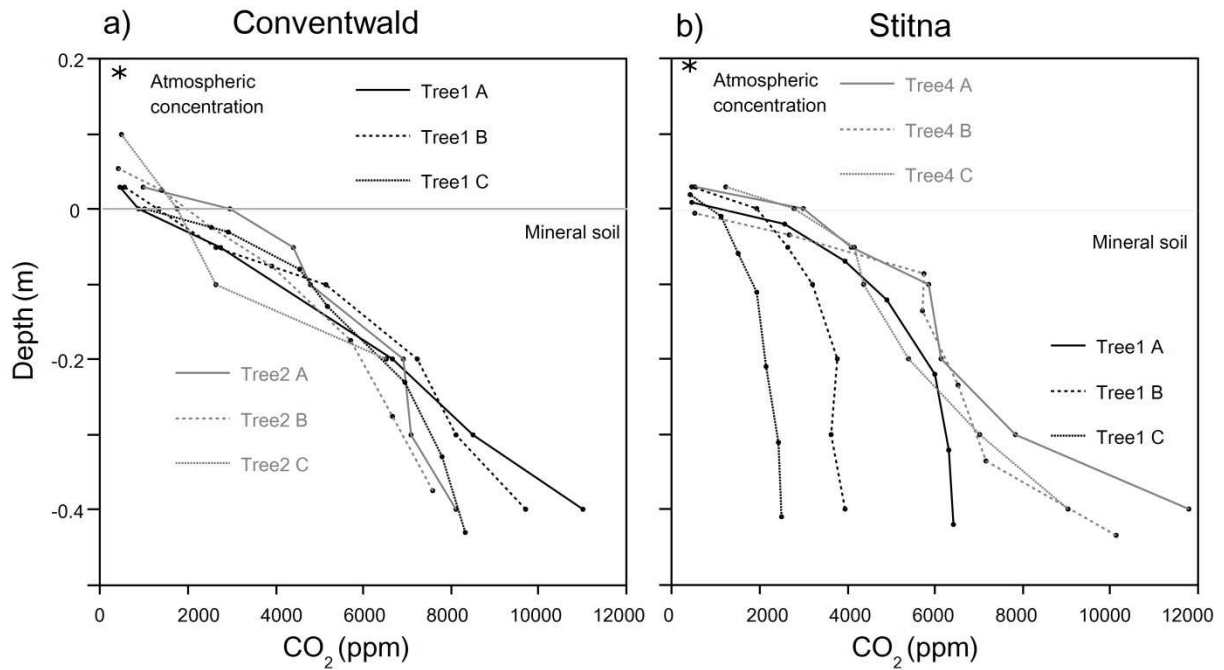

**Supplementary Figure S4. Soil CO<sub>2</sub> profiles close to two beech trees in Conventwald (a) and two trees in Stitna (b).** Profiles A, B and C lie on a straight line (transect) from stems towards the outer rim of the crown (profile A next to tree stem).

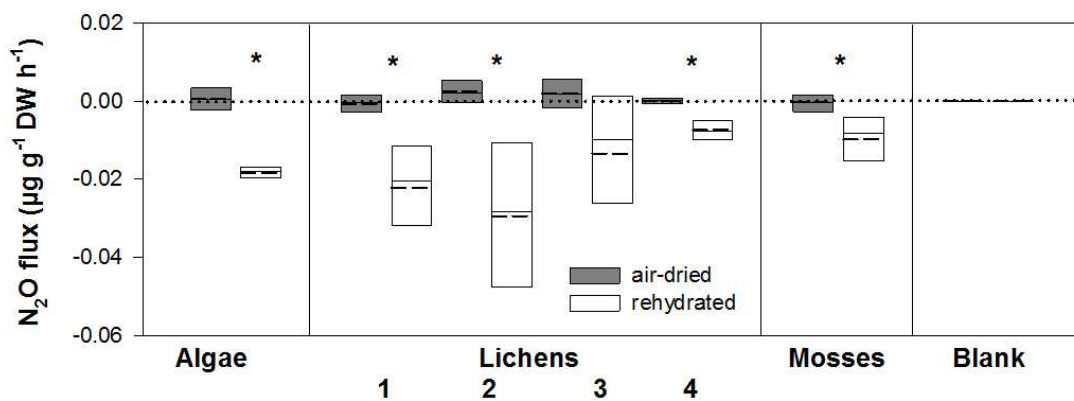

**Supplementary Figure S5. N<sub>2</sub>O fluxes in cryptogams sampled from beech bark in Conventwald, Black Forest.** The fluxes are expressed per cryptogam dry weight (DW) unit. For further information regarding flux determination, taxonomic composition of cryptogams and box plot description, see Fig. 2.

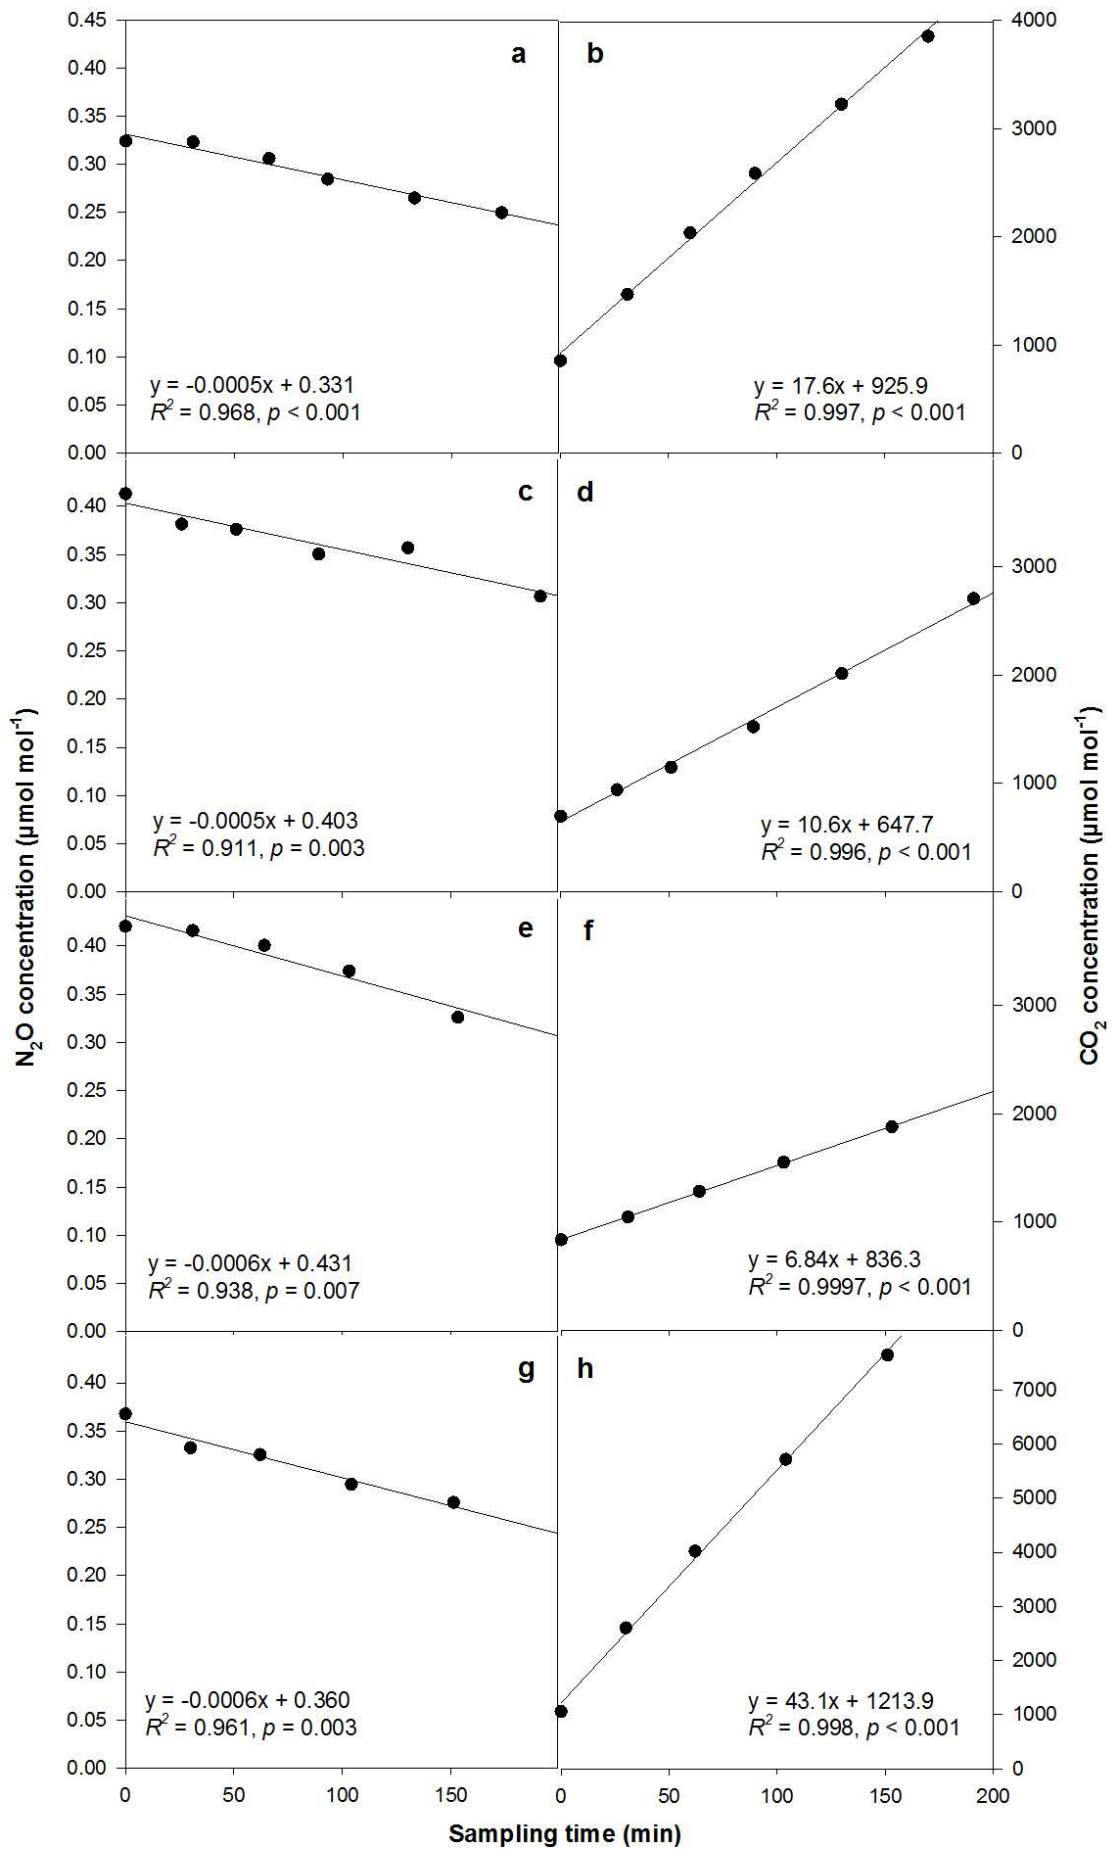

**Supplementary Figure S6. Examples of N<sub>2</sub>O (on the left) and CO<sub>2</sub> (on the right) concentration changes over time in headspace of stem chambers (a,b), and containers containing red alga/Rhodophyta (c,d), lichens (e,f) and mosses *Hypnum cupressiforme* (g,h). The gas concentrations were assessed by gas chromatography. Decrease of N<sub>2</sub>O concentration indicates N<sub>2</sub>O uptake, increase of CO<sub>2</sub> concentration indicates CO<sub>2</sub> emission.**

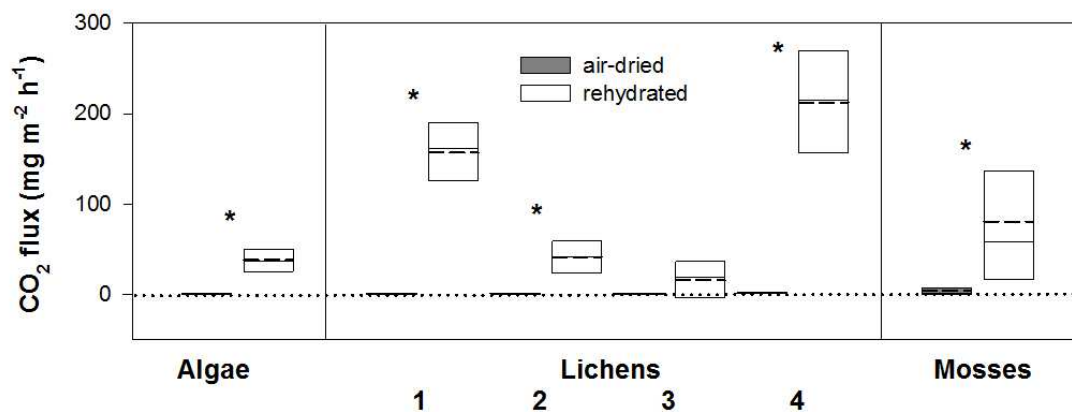

**Supplementary Figure S7. CO<sub>2</sub> fluxes in cryptogams sampled from beech bark in Conventwald, Black Forest.** Fluxes are expressed per unit of stem projected area. For further information regarding flux determination, taxonomic composition of cryptogams and box plot description, see Fig. 2.

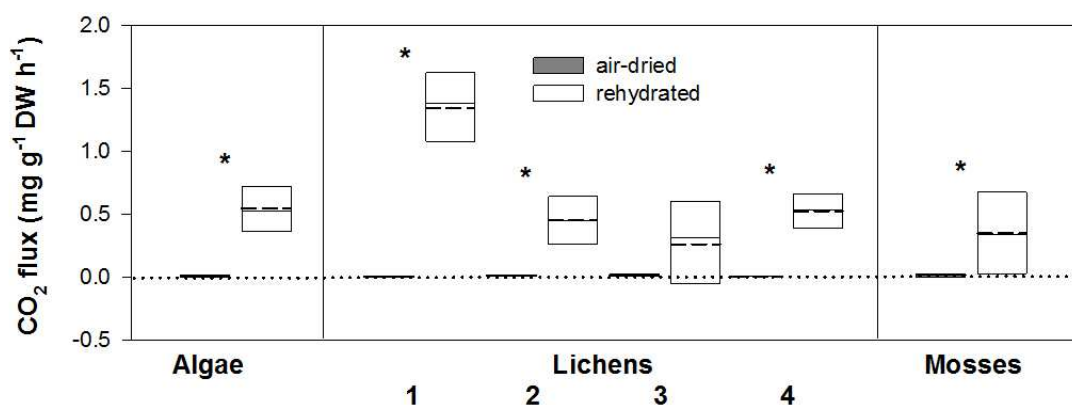

**Supplementary Figure S8. CO<sub>2</sub> fluxes in cryptogams sampled from beech bark in Conventwald, Black Forest.** Fluxes are expressed per dry weight of cryptogam (DW) unit. For further information regarding flux determination, taxonomic composition of cryptogams and box plot description, see Fig. 2.
